# Supplementary material
Source: Springer Nature journal article supplement (https://www.springermedizin.de/resource/supplementary/12874_2011_822_MOESM2_ESM.pdf/9432696)
Supplement: MOESM2 [file 9432696]

Entire CRIS-CAT Study

```
graph TD; A[Entire CRIS-CAT Study] --> B[Administration Study]; A --> C[Cross-sectional field study]; C --> D[Group A: Working Veterans]; C --> E[Group B: Homeless Veterans]; C --> F[Group C: OEF/OIF veterans]; F --> G[Longitudinal Cohort];
```

The diagram is a hierarchical flowchart. At the top is a box labeled 'Entire CRIS-CAT Study'. A vertical line descends from this box and splits into two horizontal lines. The left horizontal line leads to a box labeled 'Administration Study'. The right horizontal line leads to a box labeled 'Cross-sectional field study'. From the bottom of the 'Cross-sectional field study' box, a vertical line descends and splits into three horizontal lines. The left horizontal line leads to a box labeled 'Group A: Working Veterans'. The middle horizontal line leads to a box labeled 'Group C: OEF/OIF veterans'. The right horizontal line leads to a box labeled 'Group B: Homeless Veterans'. From the bottom of the 'Group C: OEF/OIF veterans' box, a vertical line descends to a final box labeled 'Longitudinal Cohort'.

Administration Study

Cross-sectional  
field study

Group A:  
Working Veterans

Group B:  
Homeless Veterans

Group C:  
OEF/OIF veterans

Longitudinal Cohort

Entire CRIS-CAT Study

```
graph TD; A[Entire CRIS-CAT Study] --> B[Administration Study]; A --> C[Cross-sectional field study]; C --> D[Group A: Working Veterans]; C --> E[Group B: Homeless Veterans]; C --> F[Group C: OEF/OIF veterans]; F --> G[Longitudinal Cohort];
```

The diagram is a hierarchical flowchart. At the top is a box labeled 'Entire CRIS-CAT Study'. A vertical line descends from this box and splits into two horizontal lines. The left horizontal line leads to a box labeled 'Administration Study'. The right horizontal line leads to a box labeled 'Cross-sectional field study'. From the bottom of the 'Cross-sectional field study' box, a vertical line descends. This line is crossed by a horizontal line that branches to the left and right. The left branch leads to a box labeled 'Group A: Working Veterans'. The right branch leads to a box labeled 'Group B: Homeless Veterans'. Below 'Group A: Working Veterans', a vertical line descends to a box labeled 'Group C: OEF/OIF veterans'. From the bottom of 'Group C: OEF/OIF veterans', a vertical line descends to a final box labeled 'Longitudinal Cohort'.

Administration Study

Cross-sectional  
field study

Group A:  
Working Veterans

Group B:  
Homeless Veterans

Group C:  
OEF/OIF veterans

Longitudinal Cohort
